# Supplementary material for: Floating Droplet Array: An Ultrahigh-Throughput Device for Droplet Trapping, Real-time Analysis and Recovery
Source: MDPI journal article supplement (doi:10.3390/mi6101431), 2015-09-30
Supplement: s1 [file s1]

Archive with 5 entries (5 files):
- Movie S3.avi
- Movie S4.avi
- Movie S1.avi
- Movie S2.avi
- micromachines-06-01431-supplementary.pdf
