# Supplementary material for: Floating Droplet Array: An Ultrahigh-Throughput Device for Droplet Trapping, Real-time Analysis and Recovery
Source: MDPI journal article supplement (doi:10.3390/mi6101431), 2015-09-30
Supplement: s1 [file s1 › micromachines-06-01431-supplementary.pdf]

## Supplementary Materials

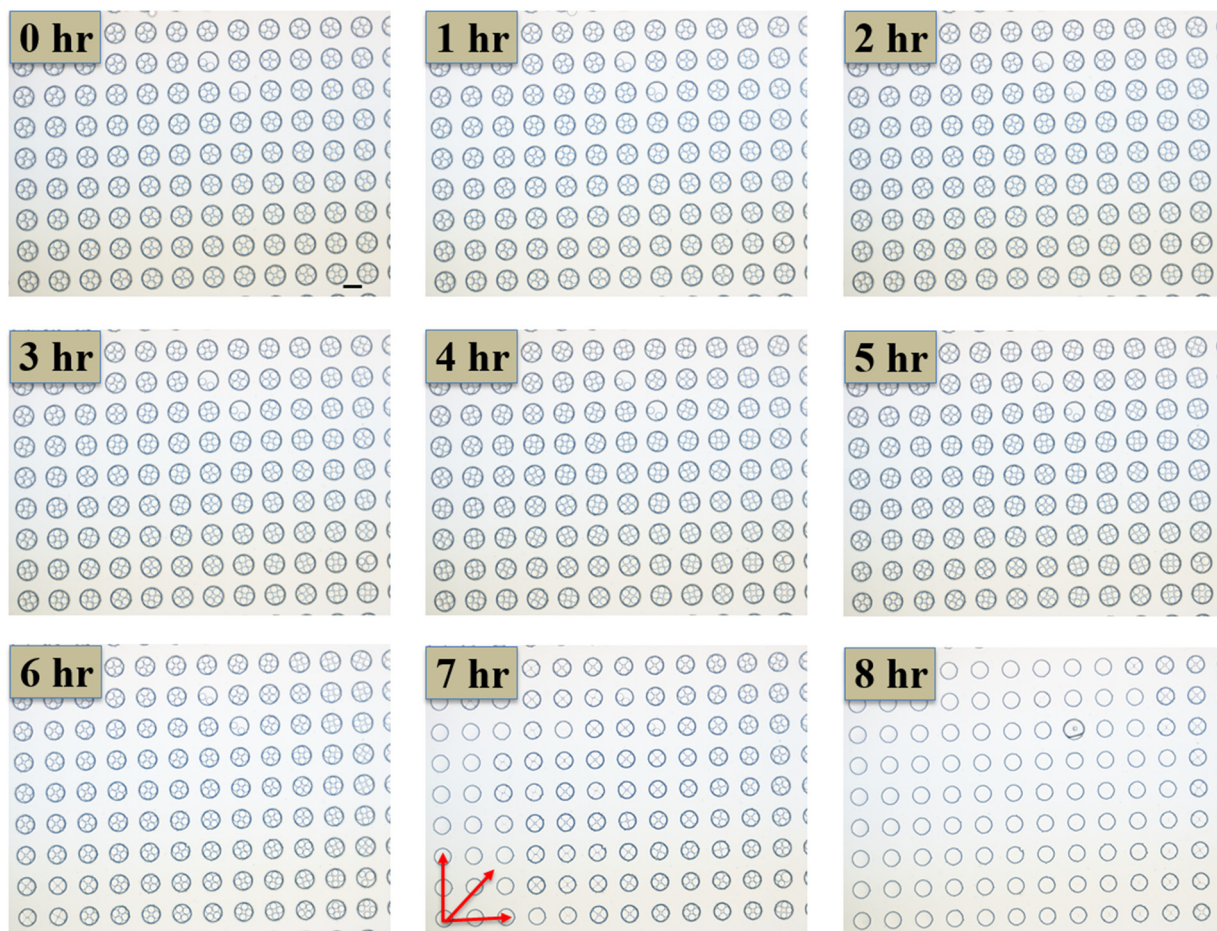

**Figure S1.** Deformation and evaporation of droplets during extended incubation times. Droplets shrink due to evaporation (29.6% reduction in volume after 5 h,  $n = 60$ ). After five hours, droplet deformation in the wells propagated from the lower left hand corner of the image to the top right hand corner. The red arrows at 7 h represent the direction of propagation for droplet deformation.

**Movie S1.** Representative video demonstrating droplet trapping in the Floating Droplet Array (FDA) device. 94  $\mu\text{m}$ -sized droplets were generated and trapped within 120  $\mu\text{m}$  wells.

**Movie S2.** Representative video demonstrating purging of residual droplets. After droplet trapping, residual droplets were purged with a high oil flow rate (10–20  $\mu\text{L}/\text{min}$ ).

**Movie S3.** Representative video demonstrating droplet recovery after flipping and applying a high oil flow rate.

**Movie S4.** Representative video showing a large-scale scan of trapped droplets. 46  $\mu\text{m}$ -sized droplets were trapped in 50  $\mu\text{m}$  wells and imaged under a microscope.
